# Supplementary material for: The Resistome of ESKAPEE Pathogens in Untreated and Treated Wastewater: A Polish Case Study
Source: MDPI journal article supplement (doi:10.3390/biom12081160), 2022-08-21
Supplement: s1 [file s1]

# The Resistome of ESKAPEE Pathogens in Untreated and Treated Wastewater: A Polish Case Study

Jakub Hubeny<sup>1</sup>, Ewa Korzeniewska<sup>1</sup>, Sławomir Ciesielski<sup>2</sup>, Grażyna Płaza<sup>3</sup>, Monika Harnisz<sup>1</sup>

<sup>1</sup>Department of Water Protection Engineering and Environmental Microbiology, Faculty of Geoengineering, University of Warmia and Mazury in Olsztyn, Olsztyn 10-720, Poland

<sup>2</sup>Department of Environmental Biotechnology, Faculty of Geoengineering, University of Warmia and Mazury in Olsztyn, Olsztyn 10-709, Poland

<sup>3</sup> Environmental Microbiology Unit, Institute for Ecology of Industrial Areas, Katowice 40-844, Poland

## Supplementary Materials

Table S1. Total read base and total read count of raw data in the analyzed samples.

| Season        | Sampling site | Total read base<br>(throughput of raw<br>data) [Gb] | Total read count of<br>raw data [M] |
|---------------|---------------|-----------------------------------------------------|-------------------------------------|
| June 2018     | UWW1          | 16                                                  | 107.2                               |
|               | PC1           | 11.4                                                | 75.46                               |
|               | MR1           | 18.4                                                | 128                                 |
|               | UWW1          | 22.8                                                | 156.7                               |
|               | URW1          | 17.6                                                | 118.3                               |
|               | DRW1          | 29.4                                                | 201.9                               |
| November 2018 | UWW2          | 16.6                                                | 103.2                               |
|               | PC2           | 17.4                                                | 121.3                               |
|               | AS2           | 15.8                                                | 112                                 |
|               | MR2           | 18.4                                                | 128.3                               |
|               | TWW2          | 15                                                  | 101                                 |
|               | DRW2          | 14.8                                                | 97                                  |
| March 2019    | UWW3          | 16.6                                                | 110                                 |
|               | PC3           | 28.6                                                | 191.8                               |
|               | AS3           | 15.2                                                | 102.3                               |
|               | UWW3          | 18.4                                                | 122.4                               |

Table S2. Abundance of ESKAPEE group members (genus level) in wastewater and river water samples (ppm). Averaged results from three seasons.

| Genus                 |      | Sampling sites |        |       |       |       |       |       |
|-----------------------|------|----------------|--------|-------|-------|-------|-------|-------|
|                       |      | UWW            | PC     | AS    | MR    | TWW   | URW   | DRW   |
| <i>Acinetobacter</i>  | Mean | 111.581        | 78.056 | 0.564 | 0.304 | 1.499 | 0.101 | 0.141 |
|                       | SD   | 52.020         | 23.406 | 0.473 | 0.000 | 1.562 | 0.000 | 0.038 |
| <i>Enterobacter</i>   | Mean | 0.495          | 0.880  | 0.006 | 0.000 | 0.393 | 0.017 | 0.007 |
|                       | SD   | 0.514          | 0.586  | 0.008 | 0.000 | 0.544 | 0.000 | 0.007 |
| <i>Enterococcus</i>   | Mean | 5.443          | 3.713  | 0.093 | 0.008 | 0.164 | 0.042 | 0.020 |
|                       | SD   | 5.510          | 0.947  | 0.074 | 0.000 | 0.163 | 0.000 | 0.020 |
| <i>Klebsiella</i>     | Mean | 2.070          | 3.682  | 0.013 | 0.008 | 0.179 | 0.025 | 0.007 |
|                       | SD   | 1.743          | 2.851  | 0.013 | 0.000 | 0.216 | 0.000 | 0.007 |
| <i>Pseudomonas</i>    | Mean | 3.534          | 4.796  | 0.647 | 0.140 | 0.692 | 0.237 | 0.144 |
|                       | SD   | 1.252          | 0.953  | 0.526 | 0.000 | 0.509 | 0.000 | 0.144 |
| <i>Staphylococcus</i> | Mean | 0.046          | 0.072  | 0.003 | 0.000 | 0.003 | 0.008 | 0.000 |
|                       | SD   | 0.036          | 0.026  | 0.004 | 0.000 | 0.004 | 0.000 | 0.000 |
| <i>Escherichia</i>    | Mean | 1.034          | 2.221  | 0.009 | 0.023 | 0.177 | 0.008 | 0.035 |
|                       | SD   | 0.416          | 1.493  | 0.001 | 0.000 | 0.143 | 0.000 | 0.035 |

Sampling sites: UWW – untreated wastewater, PC – wastewater exiting from the primary clarifier, AS – wastewater from the activated sludge tank, MR – wastewater from the multifunctional reactor, TWW – treated wastewater, URW – river water collected upstream from the wastewater discharge point, DRW – river water collected downstream from the wastewater discharge point

\*SD - standard deviation

Table S3. Abundance of ESKAPEE group members (species level) in wastewater and river water samples (ppm). Averaged results from three seasons.

| Species                        |      | Sampling sites |       |       |       |       |       |       |
|--------------------------------|------|----------------|-------|-------|-------|-------|-------|-------|
|                                |      | UWW            | PC    | AS    | MR    | TWW   | URW   | DRW   |
| <i>Acinetobacter baumannii</i> | Mean | 1.166          | 1.619 | 0.014 | 0.004 | 0.012 | 0.000 | 0.007 |
|                                | SD   | 0.825          | 0.558 | 0.008 | 0.000 | 0.017 | 0.000 | 0.007 |
| <i>Enterococcus faecium</i>    | Mean | 0.021          | 0.025 | 0.009 | 0.000 | 0.013 | 0.008 | 0.000 |
|                                | SD   | 0.016          | 0.012 | 0.004 | 0.000 | 0.014 | 0.000 | 0.000 |
| <i>Escherichia coli</i>        | Mean | 1.031          | 2.207 | 0.009 | 0.016 | 0.176 | 0.008 | 0.035 |
|                                | SD   | 0.417          | 1.485 | 0.001 | 0.000 | 0.142 | 0.000 | 0.035 |
| <i>Klebsiella pneumoniae</i>   | Mean | 0.897          | 0.275 | 0.000 | 0.004 | 0.161 | 0.008 | 0.000 |
|                                | SD   | 1.143          | 0.330 | 0.004 | 0.000 | 0.216 | 0.000 | 0.000 |
| <i>Pseudomonas aeruginosa</i>  | Mean | 0.120          | 0.084 | 0.000 | 0.000 | 0.014 | 0.008 | 0.007 |
|                                | SD   | 0.156          | 0.090 | 0.000 | 0.000 | 0.011 | 0.000 | 0.007 |
| <i>Staphylococcus aureus</i>   | Mean | 0.006          | 0.004 | 0.000 | 0.000 | 0.000 | 0.000 | 0.000 |
|                                | SD   | 0.009          | 0.006 | 0.000 | 0.000 | 0.000 | 0.000 | 0.000 |

Sampling sites as in Table S2.

\*SD - standard deviation

Table S4. Calculated reduction in the abundance of ESKAPEE group members (genus and species levels) after the wastewater treatment process. Averaged results from three seasons.

| Taxonomic units                |         | Sampling sites |         | % of reduction |
|--------------------------------|---------|----------------|---------|----------------|
|                                |         | UWW            | TWW     |                |
| <i>Acinetobacter</i>           | Generes | 111.581        | 1.499   | 98.66          |
| <i>Enterobacter</i>            |         | 0.495          | 0.393   | 20.65          |
| <i>Enterococcus</i>            |         | 5.443          | 0.164   | 96.99          |
| <i>Klebsiella</i>              |         | 2.070          | 0.179   | 91.36          |
| <i>Pseudomonas</i>             |         | 3.534          | 0.692   | 80.41          |
| <i>Staphylococcus</i>          |         | 0.046          | 0.003   | 94.04          |
| <i>Escherichia</i>             |         | 1.034          | 0.177   | 82.90          |
| <i>Acinetobacter baumannii</i> | Species | 1.166          | 0.012   | 99.00          |
| <i>Enterococcus faecium</i>    |         | 0.021          | 0.013   | 35.44          |
| <i>Escherichia coli</i>        |         | 1.031          | 0.176   | 82.95          |
| <i>Klebsiella pneumoniae</i>   |         | 0.897          | 0.161   | 82.11          |
| <i>Pseudomonas aeruginosa</i>  |         | 0.120          | 0.014   | 88.35          |
| <i>Staphylococcus aureus</i>   |         | 0.006          | 0.000   | 100.00         |
|                                |         |                | Average | 80.99          |

Sampling sites as in Table S2.

Table S5. Abundance of ESKAPEE group members (genus level) in wastewater and river water samples (ppm) collected in three seasons.

| Genus                 | UWW    |         |        | PC      |        |        | AS    |       |       | MR |       |   | TWW   |       |       | URW   |   |   | DRW   |       |   |
|-----------------------|--------|---------|--------|---------|--------|--------|-------|-------|-------|----|-------|---|-------|-------|-------|-------|---|---|-------|-------|---|
|                       | J      | N       | M      | J       | N      | M      | J     | N     | M     | J  | N     | M | J     | N     | M     | J     | N | M | J     | N     | M |
| <i>Acinetobacter</i>  | 97.388 | 181.192 | 56.164 | 107.169 | 77.139 | 49.859 | 0.273 | 0.188 | 1.232 | -  | 0.304 | - | 3.660 | 0.020 | 0.817 | 0.101 | - | - | 0.178 | 0.103 | - |
| <i>Enterobacter</i>   | 1.203  | 0.281   | 0.000  | 0.066   | 1.422  | 1.152  | 0.000 | 0.018 | 0.000 | -  | 0.000 | - | 1.161 | 0.000 | 0.016 | 0.017 | - | - | 0.015 | 0.000 | - |
| <i>Enterococcus</i>   | 3.335  | 12.994  | 0.000  | 2.637   | 4.942  | 3.561  | 0.055 | 0.196 | 0.029 | -  | 0.008 | - | 0.386 | 0.000 | 0.106 | 0.042 | - | - | 0.040 | 0.000 | - |
| <i>Klebsiella</i>     | 1.945  | 4.264   | 0.000  | 3.366   | 7.321  | 0.360  | 0.031 | 0.009 | 0.000 | -  | 0.008 | - | 0.054 | 0.000 | 0.482 | 0.025 | - | - | 0.015 | 0.000 | - |
| <i>Pseudomonas</i>    | 1.875  | 3.828   | 4.900  | 3.512   | 5.791  | 5.083  | 1.367 | 0.125 | 0.450 | -  | 0.140 | - | 0.868 | 0.000 | 1.209 | 0.237 | - | - | 0.287 | 0.000 | - |
| <i>Staphylococcus</i> | 0.089  | 0.048   | 0.000  | 0.080   | 0.099  | 0.036  | 0.008 | 0.000 | 0.000 | -  | 0.000 | - | 0.000 | 0.000 | 0.008 | 0.008 | - | - | 0.000 | 0.000 | - |
| <i>Escherichia</i>    | 0.858  | 1.609   | 0.636  | 1.405   | 4.316  | 0.944  | 0.008 | 0.009 | 0.010 | -  | 0.023 | - | 0.351 | 0.000 | 0.180 | 0.008 | - | - | 0.069 | 0.000 | - |

Sampling sites as in Table S2. Months of sample collection: J – June, N – November, M – March.

Table S6. Abundance of ESKAPEE group members (species level) in wastewater and river water samples (ppm) collected in three seasons.

| Species                        | UWW   |       |       | PC    |       |       | AS    |       |       | MR |       |   | TWW   |       |       | URW   |   |   | DRW   |       |   |
|--------------------------------|-------|-------|-------|-------|-------|-------|-------|-------|-------|----|-------|---|-------|-------|-------|-------|---|---|-------|-------|---|
|                                | J     | N     | M     | J     | N     | M     | J     | N     | M     | J  | N     | M | J     | N     | M     | J     | N | M | J     | N     | M |
| <i>Acinetobacter baumannii</i> | 1.782 | 1.715 | 0.000 | 1.246 | 2.407 | 1.204 | 0.000 | 0.009 | 0.020 | -  | 0.008 | - | 0.035 | 0.000 | 0.000 | 0.000 | - | - | 0.015 | 0.000 | - |
| <i>Enterococcus faecium</i>    | 0.023 | 0.039 | 0.000 | 0.013 | 0.041 | 0.021 | 0.000 | 0.009 | 0.010 | -  | 0.000 | - | 0.032 | 0.000 | 0.008 | 0.008 | - | - | 0.000 | 0.000 | - |
| <i>Escherichia coli</i>        | 0.849 | 1.609 | 0.636 | 1.391 | 4.291 | 0.938 | 0.008 | 0.009 | 0.010 | -  | 0.023 | - | 0.348 | 0.000 | 0.180 | 0.008 | - | - | 0.069 | 0.000 | - |
| <i>Klebsiella pneumoniae</i>   | 0.182 | 2.510 | 0.000 | 0.742 | 0.037 | 0.047 | 0.008 | 0.000 | 0.000 | -  | 0.000 | - | 0.016 | 0.000 | 0.466 | 0.008 | - | - | 0.000 | 0.000 | - |
| <i>Pseudomonas aeruginosa</i>  | 0.340 | 0.010 | 0.009 | 0.212 | 0.021 | 0.021 | 0.000 | 0.000 | 0.000 | -  | 0.000 | - | 0.026 | 0.000 | 0.016 | 0.008 | - | - | 0.015 | 0.000 | - |
| <i>Staphylococcus aureus</i>   | 0.000 | 0.019 | 0.000 | 0.013 | 0.000 | 0.000 | 0.000 | 0.000 | 0.000 | -  | 0.000 | - | 0.000 | 0.000 | 0.000 | 0.000 | - | - | 0.000 | 0.000 | - |

Sampling sites as in Table S2. Months of sample collection: J – June, N – November, M – March.

Table S7. Selected subtypes and/or types of antibiotic resistance genes in a metagenomic analysis.

| Genes                       | Types or subtypes                                                                                                                                                                                                                                                                                                                                                                                                                                                                                                                                                                                         |
|-----------------------------|-----------------------------------------------------------------------------------------------------------------------------------------------------------------------------------------------------------------------------------------------------------------------------------------------------------------------------------------------------------------------------------------------------------------------------------------------------------------------------------------------------------------------------------------------------------------------------------------------------------|
| <i>bla</i> <sub>PER</sub>   | 1, 2                                                                                                                                                                                                                                                                                                                                                                                                                                                                                                                                                                                                      |
| <i>bla</i> <sub>VEB</sub>   | 1                                                                                                                                                                                                                                                                                                                                                                                                                                                                                                                                                                                                         |
| <i>bla</i> <sub>IMP</sub>   | 1                                                                                                                                                                                                                                                                                                                                                                                                                                                                                                                                                                                                         |
| <i>bla</i> <sub>VIM</sub>   | 1, 2                                                                                                                                                                                                                                                                                                                                                                                                                                                                                                                                                                                                      |
| <i>bla</i> <sub>GES</sub>   | 2, 4, 5, 6, 14, 18, 20                                                                                                                                                                                                                                                                                                                                                                                                                                                                                                                                                                                    |
| <i>bla</i> <sub>KPC</sub>   | 1, 3, 4, 5, 6, 7, 8, 9, 10, 11, 12, 13, 14, 15, 16, 17, 19, 22, 24                                                                                                                                                                                                                                                                                                                                                                                                                                                                                                                                        |
| <i>bla</i> <sub>NDM</sub>   | 1, 2                                                                                                                                                                                                                                                                                                                                                                                                                                                                                                                                                                                                      |
| <i>bla</i> <sub>OXA</sub>   | 23, 24, 51, 58                                                                                                                                                                                                                                                                                                                                                                                                                                                                                                                                                                                            |
| <i>bla</i> <sub>CTX-M</sub> | 1, 10, 100, 101, 102, 103, 104, 105, 106, 107, 108, 109, 11, 110, 111, 112, 113, 114, 115, 116, 117, 12, 121, 122, 123, 124, 125, 126, 129, 13, 130, 131, 132, 134, 136, 137, 139, 14, 141, 142, 144, 147, 148, 15, 152, 155, 156, 157, 158, 159, 16, 160, 17, 19, 2, 20, 21, 22, 23, 24, 25, 26, 27, 28, 29, 3, 30, 31, 32, 33, 34, 35, 36, 37, 38, 39, 4, 40, 41, 42, 43, 44, 45, 46, 47, 48, 49, 5, 50, 51, 52, 53, 54, 55, 56, 58, 59, 6, 60, 61, 62, 63, 64, 65, 66, 67, 68, 69, 7, 71, 72, 74, 75, 76, 77, 78, 79, 8, 80, 81, 82, 83, 84, 85, 86, 87, 88, 89, 9, 90, 91, 92, 93, 94, 95, 96, 98, 99 |
| <i>bla</i> <sub>SHV</sub>   | 2, 20, 21, 22, 23, 24, 25, 26, 27, 28, 29, 2A, 3, 30, 31, 32, 33, 34, 35, 36, 37, 38, 4, 40, 41, 42, 43, 44, 45, 46, 48, 49, 5, 50, 51, 52, 53, 55, 56, 57, 59, 6, 60, 61, 62, 63, 64, 65, 66, 67, 69, 7, 70, 71, 72, 73, 74, 75, 76, 77, 78, 79, 8, 80, 81, 82, 83, 84, 85, 86, 89, 9, 92, 93, 94, 95, 96, 97, 98, 99                                                                                                                                                                                                                                                                                    |
| <i>bla</i> <sub>TEM</sub>   | 3, 30, 33, 34, 4, 40, 42, 43, 45, 47, 48, 49, 52, 53, 54, 55, 57, 59, 6, 60, 63, 67, 68, 7, 70, 71, 72, 73, 75, 76, 78, 79, 8, 80, 81, 82, 83, 84, 85, 86, 87, 88, 89, 90, 91, 92, 93, 94, 95, 96                                                                                                                                                                                                                                                                                                                                                                                                         |
| <i>qnrB</i>                 | 1, 10, 11, 12, 13, 14, 15, 16, 17, 18, 19, 2, 20, 21, 22, 23, 24, 25, 26, 27, 28, 29, 3, 30, 31, 32, 33, 34, 35, 36, 37, 38, 4, 40, 41, 42, 43, 44, 45, 46, 47, 48, 49, 5, 50, 54, 55, 56, 57, 58, 59, 6, 60, 61, 62, 64, 65, 66, 67, 68, 69, 7, 70, 71, 72, 73, 74, 8, 9                                                                                                                                                                                                                                                                                                                                 |
| <i>qnrD</i>                 | 1, 2                                                                                                                                                                                                                                                                                                                                                                                                                                                                                                                                                                                                      |
| <i>qnrS</i>                 | 1, 10, 11, 13, 15, 2, 3, 4, 5, 6, 7, 8, 9                                                                                                                                                                                                                                                                                                                                                                                                                                                                                                                                                                 |
| <i>qnrC</i>                 |                                                                                                                                                                                                                                                                                                                                                                                                                                                                                                                                                                                                           |
| APH(2'')-If                 |                                                                                                                                                                                                                                                                                                                                                                                                                                                                                                                                                                                                           |
| APH(2'')-Ig                 |                                                                                                                                                                                                                                                                                                                                                                                                                                                                                                                                                                                                           |
| APH(2'')-Ia                 |                                                                                                                                                                                                                                                                                                                                                                                                                                                                                                                                                                                                           |
| AAC(3)-IV                   |                                                                                                                                                                                                                                                                                                                                                                                                                                                                                                                                                                                                           |

Sampling sites as in Table S2.

Table S8. Abundance of the analyzed antibiotic resistance genes associated with ESKAPEE bacteria in wastewater and river water samples (ppm). Averaged results from three seasons.

| Gene                          |      | Sampling sites |       |       |       |       |       |       |
|-------------------------------|------|----------------|-------|-------|-------|-------|-------|-------|
|                               |      | UWW            | PC    | AS    | MR    | TWW   | URW   | DRW   |
| <i>bla</i> <sub>PER-1</sub>   | Mean | 0.098          | 0.071 | 0.000 | 0.000 | 0.014 | 0.000 | 0.000 |
|                               | SD   | 0.022          | 0.005 | 0.000 | 0.000 | 0.008 | 0.000 | 0.000 |
| <i>bla</i> <sub>PER-2</sub>   | Mean | 0.036          | 0.016 | 0.000 | 0.000 | 0.000 | 0.009 | 0.000 |
|                               | SD   | 0.017          | 0.008 | 0.000 | 0.000 | 0.000 | 0.000 | 0.000 |
| <i>bla</i> <sub>VEB-1</sub>   | Mean | 0.175          | 0.131 | 0.010 | 0.057 | 0.047 | 0.000 | 0.005 |
|                               | SD   | 0.097          | 0.092 | 0.005 | 0.029 | 0.031 | 0.000 | 0.003 |
| <i>bla</i> <sub>IMP-1</sub>   | Mean | 0.009          | 0.000 | 0.010 | 0.029 | 0.032 | 0.000 | 0.013 |
|                               | SD   | 0.004          | 0.000 | 0.005 | 0.021 | 0.029 | 0.000 | 0.003 |
| <i>bla</i> <sub>VIM</sub> *   | Mean | 0.092          | 0.025 | 0.000 | 0.000 | 0.000 | 0.000 | 0.000 |
|                               | SD   | 0.018          | 0.010 | 0.000 | 0.000 | 0.000 | 0.000 | 0.000 |
| <i>bla</i> <sub>GES</sub> *   | Mean | 2.364          | 2.341 | 0.043 | 0.021 | 0.084 | 0.000 | 0.013 |
|                               | SD   | 0.013          | 0.016 | 0.000 | 0.000 | 0.001 | 0.000 | 0.000 |
| <i>bla</i> <sub>KPC</sub> *   | Mean | 0.009          | 0.011 | 0.000 | 0.000 | 0.000 | 0.000 | 0.000 |
|                               | SD   | 0.000          | 0.000 | 0.000 | 0.000 | 0.000 | 0.000 | 0.000 |
| <i>bla</i> <sub>NDM</sub> *   | Mean | 0.018          | 0.009 | 0.000 | 0.000 | 0.000 | 0.000 | 0.000 |
|                               | SD   | 0.000          | 0.000 | 0.000 | 0.000 | 0.000 | 0.000 | 0.000 |
| <i>bla</i> <sub>OXA-23</sub>  | Mean | 0.019          | 0.013 | 0.000 | 0.000 | 0.000 | 0.000 | 0.000 |
|                               | SD   | 0.014          | 0.006 | 0.000 | 0.000 | 0.000 | 0.000 | 0.000 |
| <i>bla</i> <sub>OXA-24</sub>  | Mean | 0.014          | 0.005 | 0.000 | 0.000 | 0.000 | 0.000 | 0.000 |
|                               | SD   | 0.007          | 0.002 | 0.000 | 0.000 | 0.000 | 0.000 | 0.000 |
| <i>bla</i> <sub>OXA-51</sub>  | Mean | 0.025          | 0.019 | 0.000 | 0.000 | 0.000 | 0.000 | 0.000 |
|                               | SD   | 0.011          | 0.009 | 0.000 | 0.000 | 0.000 | 0.000 | 0.000 |
| <i>bla</i> <sub>OXA-58</sub>  | Mean | 1.932          | 1.822 | 0.015 | 0.000 | 0.059 | 0.000 | 0.015 |
|                               | SD   | 0.506          | 0.563 | 0.005 | 0.000 | 0.039 | 0.000 | 0.005 |
| <i>bla</i> <sub>CTX-M</sub> * | Mean | 0.050          | 0.031 | 0.000 | 0.000 | 0.018 | 0.000 | 0.000 |
|                               | SD   | 0.042          | 0.026 | 0.000 | 0.000 | 0.010 | 0.000 | 0.000 |
| <i>bla</i> <sub>SHV</sub> *   | Mean | 0.022          | 0.091 | 0.000 | 0.000 | 0.007 | 0.000 | 0.000 |
|                               | SD   | 0.003          | 0.006 | 0.000 | 0.000 | 0.000 | 0.000 | 0.000 |
| <i>bla</i> <sub>TEM</sub> *   | Mean | 0.718          | 0.756 | 0.016 | 0.016 | 0.079 | 0.000 | 0.020 |
|                               | SD   | 0.021          | 0.023 | 0.002 | 0.000 | 0.003 | 0.000 | 0.000 |
| <i>APH</i> (2'')-If           | Mean | 0.000          | 0.013 | 0.000 | 0.000 | 0.000 | 0.000 | 0.000 |
|                               | SD   | 0.000          | 0.011 | 0.000 | 0.000 | 0.000 | 0.000 | 0.000 |
| <i>APH</i> (2'')-Ig           | Mean | 0.018          | 0.016 | 0.000 | 0.000 | 0.000 | 0.000 | 0.000 |
|                               | SD   | 0.000          | 0.000 | 0.000 | 0.000 | 0.000 | 0.000 | 0.000 |
| <i>APH</i> (2'')-Ia           | Mean | 0.034          | 0.020 | 0.010 | 0.000 | 0.011 | 0.000 | 0.000 |
|                               | SD   | 0.019          | 0.014 | 0.000 | 0.000 | 0.003 | 0.000 | 0.000 |
| <i>AAC</i> (3)-IV             | Mean | 0.009          | 0.005 | 0.000 | 0.000 | 0.000 | 0.000 | 0.000 |
|                               | SD   | 0.000          | 0.000 | 0.000 | 0.000 | 0.000 | 0.000 | 0.000 |
| <i>qnrB</i> *                 | Mean | 0.253          | 0.366 | 0.000 | 0.000 | 0.054 | 0.000 | 0.000 |

|               |      |       |       |       |       |       |       |       |
|---------------|------|-------|-------|-------|-------|-------|-------|-------|
|               | SD   | 0.024 | 0.043 | 0.000 | 0.000 | 0.009 | 0.000 | 0.000 |
| <i>qnrC</i>   | Mean | 0.009 | 0.016 | 0.000 | 0.000 | 0.000 | 0.000 | 0.000 |
|               | SD   | 0.000 | 0.000 | 0.000 | 0.000 | 0.000 | 0.000 | 0.000 |
| <i>qnrD</i> * | Mean | 0.042 | 0.037 | 0.000 | 0.000 | 0.000 | 0.000 | 0.000 |
|               | SD   | 0.000 | 0.000 | 0.000 | 0.000 | 0.000 | 0.000 | 0.000 |
| <i>qnrS</i> * | Mean | 1.084 | 1.455 | 0.019 | 0.000 | 0.107 | 0.009 | 0.009 |
|               | SD   | 0.264 | 0.345 | 0.000 | 0.000 | 0.024 | 0.000 | 0.003 |

Sampling sites as in Table S2.

\* Genes were merged into type groups because subtype read counts were highly similar or did not differ significantly.

Table S9. Statistical analysis - Mann-Whitney U test.

| Sampling site | Rank Sum | Rank Sum | U        | Z        | p-value  |
|---------------|----------|----------|----------|----------|----------|
| AS vs. WM5    | 897.5000 | 1055.500 | 401.5000 | -1.10517 | 0.269088 |
| MR vs. WM5    | 865.0000 | 1088.000 | 369.0000 | -1.56272 | 0.118119 |

Table S10. Calculated reduction in the abundance of the analyzed antibiotic resistance genes after the wastewater treatment process. Averaged results from three seasons (ppm).

| Gene                         | Sampling sites |       | % of reduction |
|------------------------------|----------------|-------|----------------|
|                              | UWW            | TWW   |                |
| <i>bla</i> <sub>PER-1</sub>  | 0.098          | 0.014 | 85.70          |
| <i>bla</i> <sub>PER-2</sub>  | 0.036          | 0.000 | 100.00         |
| <i>bla</i> <sub>VEB-1</sub>  | 0.175          | 0.047 | 73.18          |
| <i>bla</i> <sub>IMP-1</sub>  | 0.009          | 0.032 | -              |
| <i>bla</i> <sub>VIM</sub>    | 0.092          | 0.000 | 100.00         |
| <i>bla</i> <sub>GES</sub>    | 2.364          | 0.084 | 96.44          |
| <i>bla</i> <sub>KPC</sub>    | 0.009          | 0.000 | 100.00         |
| <i>bla</i> <sub>NDM</sub>    | 0.018          | 0.000 | 100.00         |
| <i>bla</i> <sub>OXA-23</sub> | 0.019          | 0.000 | 100.00         |
| <i>bla</i> <sub>OXA-24</sub> | 0.014          | 0.000 | 100.00         |
| <i>bla</i> <sub>OXA-51</sub> | 0.025          | 0.000 | 100.00         |
| <i>bla</i> <sub>OXA-58</sub> | 1.932          | 0.059 | 96.96          |
| <i>bla</i> <sub>CTX-M</sub>  | 0.050          | 0.018 | 63.73          |
| <i>bla</i> <sub>SHV</sub>    | 0.022          | 0.007 | 70.54          |
| <i>bla</i> <sub>TEM</sub>    | 0.718          | 0.079 | 89.02          |
| <i>APH</i> (2")-If           | 0.000          | 0.000 | -              |
| <i>APH</i> (2")-Ig           | 0.018          | 0.000 | 100.00         |
| <i>APH</i> (2")-Ia           | 0.034          | 0.011 | 68.49          |
| <i>AAC</i> (3)-IV            | 0.009          | 0.000 | 100.00         |
| <i>qnrB</i>                  | 0.253          | 0.054 | 78.74          |
| <i>qnrC</i>                  | 0.009          | 0.000 | 100.00         |
| <i>qnrD</i>                  | 0.042          | 0.000 | 100.00         |

|             |       |         |       |
|-------------|-------|---------|-------|
| <i>qnrS</i> | 1.084 | 0.107   | 90.13 |
|             |       | Average | 91.09 |

Sampling sites as in Table S1.

Table S11. Abundance of the analyzed integron genes in wastewater and river water samples (ppm). Averaged results from three seasons.

| Genes        |      | Sampling sites |          |         |         |          |        |         |
|--------------|------|----------------|----------|---------|---------|----------|--------|---------|
|              |      | UWW            | PC       | AS      | MR      | TWW      | URW    | DRW     |
| <i>intI1</i> | Mean | 2911.291       | 2718.354 | 521.963 | 519.424 | 1061.185 | 78.177 | 178.985 |
|              | SD   | 373.284        | 1314.974 | 247.672 | 244.081 | 634.413  | 0.000  | 22.827  |
| <i>intI2</i> | Mean | 34.406         | 32.064   | 0.580   | 0.533   | 1.458    | 0.000  | 0.369   |
|              | SD   | 29.780         | 30.329   | 0.065   | 0.000   | 1.423    | 0.000  | 0.013   |
| <i>intI3</i> | Mean | 10.025         | 6.244    | 2.410   | 2.831   | 7.650    | 0.154  | 1.158   |
|              | SD   | 2.734          | 2.974    | 0.247   | 0.348   | 7.654    | 0.000  | 0.527   |

Sampling sites as in Table S2.

\*SD - standard deviation

Table S12. Calculated pollution of the analyzed samples with antibiotic resistance genes after the wastewater treatment process. Averaged results from three seasons (ppm).

| Gene                        | Sampling sites |       | Indication of pollution* |
|-----------------------------|----------------|-------|--------------------------|
|                             | URW            | DRW   |                          |
| <i>bla<sub>PER-1</sub></i>  | 0.000          | 0.000 | -                        |
| <i>bla<sub>PER-2</sub></i>  | 0.009          | 0.000 | ↓                        |
| <i>bla<sub>VEB-1</sub></i>  | 0.000          | 0.005 | ↑                        |
| <i>bla<sub>IMP-1</sub></i>  | 0.000          | 0.013 | ↑                        |
| <i>bla<sub>VIM</sub></i>    | 0.000          | 0.000 | -                        |
| <i>bla<sub>GES</sub></i>    | 0.000          | 0.013 | ↑                        |
| <i>bla<sub>KPC</sub></i>    | 0.000          | 0.000 | -                        |
| <i>bla<sub>NDM</sub></i>    | 0.000          | 0.000 | -                        |
| <i>bla<sub>OXA-23</sub></i> | 0.000          | 0.000 | -                        |
| <i>bla<sub>OXA-24</sub></i> | 0.000          | 0.000 | -                        |
| <i>bla<sub>OXA-51</sub></i> | 0.000          | 0.000 | -                        |
| <i>bla<sub>OXA-58</sub></i> | 0.000          | 0.015 | ↑                        |
| <i>bla<sub>CTX-M</sub></i>  | 0.000          | 0.000 | -                        |
| <i>bla<sub>SHV</sub></i>    | 0.000          | 0.000 | -                        |
| <i>bla<sub>TEM</sub></i>    | 0.000          | 0.020 | ↑                        |
| <i>APH(2'')-If</i>          | 0.000          | 0.000 | -                        |
| <i>APH(2'')-Ig</i>          | 0.000          | 0.000 | -                        |
| <i>APH(2'')-Ia</i>          | 0.000          | 0.000 | -                        |
| <i>AAC(3)-IV</i>            | 0.000          | 0.000 | -                        |
| <i>qnrB</i>                 | 0.000          | 0.000 | -                        |
| <i>qnrC</i>                 | 0.000          | 0.000 | -                        |
| <i>qnrD</i>                 | 0.000          | 0.000 | -                        |
| <i>qnrS</i>                 | 0.000          | 0.004 | ↑                        |



|              |        |         |   |
|--------------|--------|---------|---|
| <i>intI1</i> | 78.177 | 178.985 | ↑ |
| <i>intI2</i> | 0.000  | 0.369   | ↑ |
| <i>intI3</i> | 0.154  | 1.158   | ↑ |

Sampling sites as in Table S2.

\* Indication of pollution: “-” no differences in gene abundance between sampling sites; “↓” a decrease in gene abundance after wastewater discharge; “↑” an increase in gene abundance after wastewater discharge.

Table S13. Abundance of the analyzed antibiotic resistance genes associated with ESKAPEE bacteria in wastewater and river water samples (ppm) collected in three seasons.

| Gene                         | UWW   |       |       | PC    |       |       | AS    |       |       | MR |       |   | TWW   |       |       | URW   |   |   | DRW   |       |   |
|------------------------------|-------|-------|-------|-------|-------|-------|-------|-------|-------|----|-------|---|-------|-------|-------|-------|---|---|-------|-------|---|
|                              | J     | N     | M     | J     | N     | M     | J     | N     | M     | J  | N     | M | J     | N     | M     | J     | N | M | J     | N     | M |
| <i>bla</i> <sub>PER-1</sub>  | 0.094 | 0.127 | 0.073 | 0.066 | 0.078 | 0.069 | 0.000 | 0.000 | 0.000 | -  | 0.000 | - | 0.020 | 0.000 | 0.008 | 0.000 | - | - | 0.000 | 0.000 | - |
| <i>bla</i> <sub>PER-2</sub>  | 0.000 | 0.036 | 0.036 | 0.013 | 0.009 | 0.026 | 0.000 | 0.000 | 0.000 | -  | 0.000 | - | 0.000 | 0.000 | 0.000 | 0.009 | - | - | 0.000 | 0.000 | - |
| <i>bla</i> <sub>VEB-1</sub>  | 0.160 | 0.064 | 0.300 | 0.132 | 0.017 | 0.243 | 0.000 | 0.010 | 0.000 | -  | 0.057 | - | 0.020 | 0.000 | 0.074 | 0.000 | - | - | 0.005 | 0.000 | - |
| <i>bla</i> <sub>IMP-1</sub>  | 0.000 | 0.000 | 0.009 | 0.000 | 0.000 | 0.000 | 0.008 | 0.000 | 0.010 | -  | 0.049 | - | 0.013 | 0.010 | 0.074 | 0.000 | - | - | 0.015 | 0.010 | - |
| <i>bla</i> <sub>VIM</sub>    | 0.061 | 0.132 | 0.082 | 0.020 | 0.035 | 0.021 | 0.000 | 0.000 | 0.000 | -  | 0.000 | - | 0.000 | 0.000 | 0.000 | 0.000 | - | - | 0.000 | 0.000 | - |
| <i>bla</i> <sub>GES</sub>    | 2.358 | 2.356 | 2.379 | 1.983 | 3.153 | 1.889 | 0.033 | 0.076 | 0.010 | -  | 0.008 | - | 0.145 | 0.049 | 0.059 | 0.000 | - | - | 0.005 | 0.020 | - |
| <i>bla</i> <sub>KPC</sub>    | 0.000 | 0.000 | 0.009 | 0.000 | 0.000 | 0.011 | 0.000 | 0.000 | 0.000 | -  | 0.000 | - | 0.000 | 0.000 | 0.000 | 0.000 | - | - | 0.000 | 0.000 | - |
| <i>bla</i> <sub>NDM</sub>    | 0.000 | 0.000 | 0.018 | 0.000 | 0.009 | 0.000 | 0.000 | 0.000 | 0.000 | -  | 0.000 | - | 0.000 | 0.000 | 0.000 | 0.000 | - | - | 0.000 | 0.000 | - |
| <i>bla</i> <sub>OXA-23</sub> | 0.038 | 0.009 | 0.009 | 0.013 | 0.000 | 0.000 | 0.000 | 0.000 | 0.000 | -  | 0.000 | - | 0.000 | 0.000 | 0.000 | 0.000 | - | - | 0.000 | 0.000 | - |
| <i>bla</i> <sub>OXA-24</sub> | 0.009 | 0.018 | 0.000 | 0.000 | 0.000 | 0.005 | 0.000 | 0.000 | 0.000 | -  | 0.000 | - | 0.000 | 0.000 | 0.000 | 0.000 | - | - | 0.000 | 0.000 | - |
| <i>bla</i> <sub>OXA-51</sub> | 0.028 | 0.036 | 0.009 | 0.000 | 0.017 | 0.021 | 0.000 | 0.000 | 0.000 | -  | 0.000 | - | 0.000 | 0.000 | 0.000 | 0.000 | - | - | 0.000 | 0.000 | - |
| <i>bla</i> <sub>OXA-58</sub> | 1.595 | 2.647 | 1.555 | 1.073 | 2.430 | 1.964 | 0.000 | 0.019 | 0.010 | -  | 0.000 | - | 0.093 | 0.000 | 0.025 | 0.000 | - | - | 0.010 | 0.020 | - |
| <i>bla</i> <sub>CTX-M</sub>  | 0.136 | 0.015 | 0.051 | 0.043 | 0.041 | 0.044 | 0.000 | 0.000 | 0.000 | -  | 0.000 | - | 0.018 | 0.000 | 0.000 | 0.000 | - | - | 0.000 | 0.000 | - |
| <i>bla</i> <sub>SHV</sub>    | 0.030 | 0.000 | 0.015 | 0.092 | 0.160 | 0.011 | 0.000 | 0.000 | 0.000 | -  | 0.000 | - | 0.007 | 0.000 | 0.000 | 0.000 | - | - | 0.000 | 0.000 | - |
| <i>bla</i> <sub>TEM</sub>    | 0.627 | 0.853 | 0.675 | 0.645 | 0.866 | 0.755 | 0.024 | 0.019 | 0.010 | -  | 0.016 | - | 0.105 | 0.058 | 0.073 | 0.000 | - | - | 0.000 | 0.020 | - |
| <i>APH</i> (2")-If           | 0.000 | 0.000 | 0.000 | 0.013 | 0.000 | 0.000 | 0.000 | 0.000 | 0.000 | -  | 0.000 | - | 0.000 | 0.000 | 0.000 | 0.000 | - | - | 0.000 | 0.000 | - |
| <i>APH</i> (2")-Ig           | 0.000 | 0.000 | 0.018 | 0.026 | 0.000 | 0.005 | 0.000 | 0.000 | 0.000 | -  | 0.000 | - | 0.000 | 0.000 | 0.000 | 0.000 | - | - | 0.000 | 0.000 | - |
| <i>APH</i> (2")-Ia           | 0.057 | 0.036 | 0.009 | 0.040 | 0.009 | 0.011 | 0.000 | 0.010 | 0.000 | -  | 0.000 | - | 0.013 | 0.000 | 0.008 | 0.000 | - | - | 0.000 | 0.000 | - |
| <i>AAC</i> (3)-IV            | 0.000 | 0.000 | 0.009 | 0.000 | 0.000 | 0.005 | 0.000 | 0.000 | 0.000 | -  | 0.000 | - | 0.000 | 0.000 | 0.000 | 0.000 | - | - | 0.000 | 0.000 | - |
| <i>qnrB</i>                  | 0.564 | 0.129 | 0.066 | 0.731 | 0.237 | 0.129 | 0.000 | 0.000 | 0.000 | -  | 0.000 | - | 0.045 | 0.000 | 0.062 | 0.000 | - | - | 0.000 | 0.000 | - |
| <i>qnrC</i>                  | 0.000 | 0.000 | 0.009 | 0.000 | 0.000 | 0.016 | 0.000 | 0.000 | 0.000 | -  | 0.000 | - | 0.000 | 0.000 | 0.000 | 0.000 | - | - | 0.000 | 0.000 | - |
| <i>qnrD</i>                  | 0.038 | 0.000 | 0.045 | 0.026 | 0.000 | 0.048 | 0.000 | 0.000 | 0.000 | -  | 0.000 | - | 0.000 | 0.000 | 0.000 | 0.000 | - | - | 0.000 | 0.000 | - |
| <i>qnrS</i>                  | 1.348 | 0.335 | 1.570 | 2.110 | 0.576 | 1.678 | 0.000 | 0.019 | 0.000 | -  | 0.000 | - | 0.193 | 0.026 | 0.103 | 0.001 | - | - | 0.006 | 0.012 | - |

Sampling sites as in Table S2. Months of sample collection: J – June, N – November, M – March.

Table S14. Abundance of the analyzed integron genes in wastewater and river water samples (ppm) collected in three seasons.

| Gene         | UWW    |         |         | PC      |         |         | AS    |       |       | MR |       |   | TWW     |       |         | URW   |   |   | DRW   |       |   |
|--------------|--------|---------|---------|---------|---------|---------|-------|-------|-------|----|-------|---|---------|-------|---------|-------|---|---|-------|-------|---|
|              | J      | N       | M       | J       | N       | M       | J     | N     | M     | J  | N     | M | J       | N     | M       | J     | N | M | J     | N     | M |
| <i>intI1</i> | 3058.6 | 2486.81 | 3188.38 | 4231.25 | 2073.69 | 1850.11 | 692.0 | 346.8 | 697.0 | -  | 346.8 | - | 1513.08 | 335.9 | 1334.56 | 78.17 | - | - | 162.8 | 195.1 | - |
|              | 75     | 5       | 3       | 8       | 0       | 4       | 15    | 32    | 93    | -  | 32    | - | 0       | 15    | 1       | 7     | - | - | 44    | 27    | - |
| <i>intI2</i> | 26.576 | 67.319  | 9.324   | 19.895  | 66.588  | 9.709   | 0.000 | 0.533 | 0.626 | -  | 0.533 | - | 2.464   | 0.000 | 0.451   | 0.000 | - | - | 0.360 | 0.378 | - |
| <i>intI3</i> | 10.683 | 12.370  | 7.022   | 8.795   | 6.960   | 2.978   | 3.077 | 2.585 | 2.235 | -  | 2.585 | - | 16.484  | 3.463 | 3.004   | 0.154 | - | - | 0.786 | 1.530 | - |

Sampling sites as in Table S2. Months of sample collection: J – June, N – November, M – March.

Table S15. Spearman rank correlation analysis of experimental variables ( $p < 0.01$ ).

|                         | blaPER-1 | blaPER-2 | blaVEB-1 | blaIMP-1 | blaVIM | blaGES | blaKPC | blaNDM | blaOXA-2 | blaOXA-24 | blaOXA-5 | blaOXA-51 | blaCTX-M | blaSHV | blaTEM | APH(2'')-I | APH(2'')-I <sub>1</sub> | APH(2'')-I <sub>2</sub> | AAC(3)-IV | QnrB  | QnrC  | QnrD  | QnrS  | intI1 | intI2 | intI3 | Acinetoba | Enterococ | Escherichi | Klebsiella | Pseudomc | Staphyloc |
|-------------------------|----------|----------|----------|----------|--------|--------|--------|--------|----------|-----------|----------|-----------|----------|--------|--------|------------|-------------------------|-------------------------|-----------|-------|-------|-------|-------|-------|-------|-------|-----------|-----------|------------|------------|----------|-----------|
| blaPER-1                | 1.00     | 0.73     | 0.81     | -0.23    | 0.88   | 0.91   | 0.84   | 0.88   | 0.88     | 0.88      | 0.88     | 0.91      | 1.00     | 0.96   | 0.87   | 0.45       | 0.88                    | 0.94                    | 0.88      | 0.96  | 0.84  | 0.88  | 0.87  | 0.91  | 0.91  | 0.87  | 0.77      | 0.87      | 0.87       | 0.91       | 0.91     | 0.88      |
| blaPER-2                | 0.73     | 1.00     | 0.51     | -0.78    | 0.88   | 0.51   | 0.84   | 0.88   | 0.88     | 0.88      | 0.88     | 0.57      | 0.73     | 0.68   | 0.47   | 0.45       | 0.88                    | 0.63                    | 0.88      | 0.68  | 0.84  | 0.88  | 0.57  | 0.51  | 0.51  | 0.37  | 0.47      | 0.68      | 0.47       | 0.82       | 0.82     | 0.88      |
| blaVEB-1                | 0.81     | 0.51     | 1.00     | -0.02    | 0.80   | 0.89   | 0.76   | 0.80   | 0.80     | 0.80      | 0.80     | 0.68      | 0.81     | 0.77   | 0.79   | 0.41       | 0.80                    | 0.78                    | 0.80      | 0.77  | 0.76  | 0.80  | 0.61  | 0.89  | 0.89  | 0.89  | 0.71      | 0.63      | 0.79       | 0.70       | 0.54     | 0.80      |
| blaIMP-1                | -0.23    | -0.78    | -0.02    | 1.00     | -0.52  | -0.05  | -0.58  | -0.52  | -0.52    | -0.52     | -0.52    | -0.14     | -0.23    | -0.29  | -0.04  | -0.51      | -0.52                   | -0.22                   | -0.52     | -0.29 | -0.58 | -0.52 | -0.31 | -0.05 | -0.05 | 0.22  | -0.25     | -0.42     | -0.04      | -0.35      | -0.40    | -0.52     |
| blaVIM                  | 0.88     | 0.88     | 0.80     | -0.52    | 1.00   | 0.80   | 0.94   | 1.00   | 1.00     | 1.00      | 1.00     | 0.81      | 0.88     | 0.84   | 0.76   | 0.51       | 1.00                    | 0.83                    | 1.00      | 0.84  | 0.94  | 1.00  | 0.76  | 0.80  | 0.80  | 0.67  | 0.76      | 0.76      | 0.76       | 0.81       | 0.81     | 1.00      |
| blaGES                  | 0.91     | 0.51     | 0.89     | -0.05    | 0.80   | 1.00   | 0.76   | 0.80   | 0.80     | 0.80      | 0.80     | 0.86      | 0.91     | 0.87   | 0.82   | 0.41       | 0.80                    | 0.96                    | 0.80      | 0.87  | 0.76  | 0.80  | 0.86  | 1.00  | 1.00  | 0.93  | 0.89      | 0.85      | 0.82       | 0.72       | 0.67     | 0.80      |
| blaKPC                  | 0.84     | 0.84     | 0.76     | -0.58    | 0.94   | 0.84   | 1.00   | 0.94   | 0.94     | 0.94      | 0.94     | 0.76      | 0.84     | 0.88   | 0.88   | 0.76       | 0.94                    | 0.79                    | 0.94      | 0.88  | 1.00  | 0.94  | 0.80  | 0.76  | 0.76  | 0.58  | 0.80      | 0.81      | 0.80       | 0.76       | 0.76     | 0.94      |
| blaNDM                  | 0.88     | 0.88     | 0.80     | -0.52    | 1.00   | 0.80   | 0.94   | 1.00   | 1.00     | 1.00      | 1.00     | 0.81      | 0.88     | 0.84   | 0.76   | 0.51       | 1.00                    | 0.83                    | 1.00      | 0.84  | 0.94  | 1.00  | 0.76  | 0.80  | 0.80  | 0.67  | 0.76      | 0.76      | 0.76       | 0.81       | 0.81     | 1.00      |
| blaOXA-2                | 0.88     | 0.88     | 0.80     | -0.52    | 1.00   | 0.80   | 0.94   | 1.00   | 1.00     | 1.00      | 1.00     | 0.81      | 0.88     | 0.84   | 0.76   | 0.51       | 1.00                    | 0.83                    | 1.00      | 0.84  | 0.94  | 1.00  | 0.76  | 0.80  | 0.80  | 0.67  | 0.76      | 0.76      | 0.76       | 0.81       | 0.81     | 1.00      |
| blaOXA-24               | 0.88     | 0.88     | 0.80     | -0.52    | 1.00   | 0.80   | 0.94   | 1.00   | 1.00     | 1.00      | 1.00     | 0.81      | 0.88     | 0.84   | 0.76   | 0.51       | 1.00                    | 0.83                    | 1.00      | 0.84  | 0.94  | 1.00  | 0.76  | 0.80  | 0.80  | 0.67  | 0.76      | 0.76      | 0.76       | 0.81       | 0.81     | 1.00      |
| blaOXA-5                | 0.88     | 0.88     | 0.80     | -0.52    | 1.00   | 0.80   | 0.94   | 1.00   | 1.00     | 1.00      | 1.00     | 0.81      | 0.88     | 0.84   | 0.76   | 0.51       | 1.00                    | 0.83                    | 1.00      | 0.84  | 0.94  | 1.00  | 0.76  | 0.80  | 0.80  | 0.67  | 0.76      | 0.76      | 0.76       | 0.81       | 0.81     | 1.00      |
| blaOXA-51               | 0.91     | 0.57     | 0.68     | -0.14    | 0.81   | 0.86   | 0.76   | 0.81   | 0.81     | 0.81      | 0.81     | 1.00      | 0.91     | 0.87   | 0.90   | 0.41       | 0.81                    | 0.90                    | 0.81      | 0.87  | 0.76  | 0.81  | 0.92  | 0.86  | 0.86  | 0.77  | 0.85      | 0.79      | 0.90       | 0.69       | 0.83     | 0.81      |
| blaCTX-M                | 1.00     | 0.73     | 0.81     | -0.23    | 0.88   | 0.91   | 0.84   | 0.88   | 0.88     | 0.88      | 0.88     | 0.91      | 1.00     | 0.96   | 0.87   | 0.45       | 0.88                    | 0.94                    | 0.88      | 0.96  | 0.84  | 0.88  | 0.87  | 0.91  | 0.91  | 0.87  | 0.77      | 0.87      | 0.87       | 0.91       | 0.91     | 0.88      |
| blaSHV                  | 0.96     | 0.68     | 0.77     | -0.29    | 0.84   | 0.87   | 0.88   | 0.84   | 0.84     | 0.84      | 0.84     | 0.87      | 0.96     | 0.91   | 0.91   | 0.68       | 0.84                    | 0.90                    | 0.84      | 1.00  | 0.88  | 0.84  | 0.91  | 0.87  | 0.87  | 0.79  | 0.81      | 0.91      | 0.91       | 0.87       | 0.87     | 0.84      |
| blaTEM                  | 0.87     | 0.47     | 0.79     | -0.04    | 0.76   | 0.82   | 0.80   | 0.76   | 0.76     | 0.76      | 0.76     | 0.90      | 0.87     | 0.91   | 1.00   | 0.61       | 0.76                    | 0.78                    | 0.76      | 0.91  | 0.80  | 0.76  | 0.82  | 0.82  | 0.82  | 0.79  | 0.79      | 0.70      | 1.00       | 0.68       | 0.74     | 0.76      |
| APH(2'')-I              | 0.45     | 0.45     | 0.41     | -0.51    | 0.51   | 0.41   | 0.76   | 0.51   | 0.51     | 0.51      | 0.51     | 0.41      | 0.45     | 0.68   | 0.61   | 1.00       | 0.51                    | 0.42                    | 0.51      | 0.68  | 0.76  | 0.51  | 0.61  | 0.41  | 0.41  | 0.20  | 0.61      | 0.62      | 0.61       | 0.41       | 0.41     | 0.51      |
| APH(2'')-I <sub>1</sub> | 0.88     | 0.88     | 0.80     | -0.52    | 1.00   | 0.80   | 0.94   | 1.00   | 1.00     | 1.00      | 1.00     | 0.81      | 0.88     | 0.84   | 0.76   | 0.51       | 1.00                    | 0.83                    | 1.00      | 0.84  | 0.94  | 1.00  | 0.76  | 0.80  | 0.80  | 0.67  | 0.76      | 0.76      | 0.76       | 0.81       | 0.81     | 1.00      |
| aacA/aphI               | 0.94     | 0.63     | 0.78     | -0.22    | 0.83   | 0.96   | 0.79   | 0.83   | 0.83     | 0.83      | 0.83     | 0.90      | 0.94     | 0.90   | 0.78   | 0.42       | 0.83                    | 1.00                    | 0.83      | 0.90  | 0.79  | 0.83  | 0.93  | 0.96  | 0.96  | 0.85  | 0.89      | 0.93      | 0.78       | 0.79       | 0.79     | 0.83      |
| AAC(3)-IV               | 0.88     | 0.88     | 0.80     | -0.52    | 1.00   | 0.80   | 0.94   | 1.00   | 1.00     | 1.00      | 1.00     | 0.81      | 0.88     | 0.84   | 0.76   | 0.51       | 1.00                    | 0.83                    | 1.00      | 0.84  | 0.94  | 1.00  | 0.76  | 0.80  | 0.80  | 0.67  | 0.76      | 0.76      | 0.76       | 0.81       | 0.81     | 1.00      |
| QnrB                    | 0.96     | 0.68     | 0.77     | -0.29    | 0.84   | 0.87   | 0.88   | 0.84   | 0.84     | 0.84      | 0.84     | 0.87      | 0.96     | 1.00   | 0.91   | 0.68       | 0.84                    | 0.90                    | 0.84      | 1.00  | 0.88  | 0.84  | 0.91  | 0.87  | 0.87  | 0.79  | 0.81      | 0.91      | 0.91       | 0.87       | 0.87     | 0.84      |
| QnrC                    | 0.84     | 0.84     | 0.76     | -0.58    | 0.94   | 0.76   | 1.00   | 0.94   | 0.94     | 0.94      | 0.94     | 0.76      | 0.84     | 0.88   | 0.80   | 0.76       | 0.94                    | 0.79                    | 0.94      | 0.88  | 1.00  | 0.94  | 0.80  | 0.76  | 0.76  | 0.58  | 0.80      | 0.81      | 0.80       | 0.76       | 0.76     | 0.94      |
| QnrD                    | 0.88     | 0.88     | 0.80     | -0.52    | 1.00   | 0.80   | 0.94   | 1.00   | 1.00     | 1.00      | 1.00     | 0.81      | 0.88     | 0.84   | 0.76   | 0.51       | 1.00                    | 0.83                    | 1.00      | 0.84  | 0.94  | 1.00  | 0.76  | 0.80  | 0.80  | 0.67  | 0.76      | 0.76      | 0.76       | 0.81       | 0.81     | 1.00      |
| QnrS                    | 0.87     | 0.57     | 0.61     | -0.31    | 0.76   | 0.86   | 0.80   | 0.76   | 0.76     | 0.76      | 0.76     | 0.92      | 0.87     | 0.91   | 0.82   | 0.61       | 0.76                    | 0.93                    | 0.76      | 0.91  | 0.80  | 0.76  | 1.00  | 0.86  | 0.86  | 0.68  | 0.93      | 0.94      | 0.82       | 0.67       | 0.77     | 0.76      |
| intI1                   | 0.91     | 0.51     | 0.89     | -0.05    | 0.80   | 1.00   | 0.76   | 0.80   | 0.80     | 0.80      | 0.80     | 0.86      | 0.91     | 0.87   | 0.82   | 0.41       | 0.80                    | 0.96                    | 0.80      | 0.87  | 0.76  | 0.80  | 0.86  | 1.00  | 1.00  | 0.93  | 0.89      | 0.85      | 0.82       | 0.72       | 0.67     | 0.80      |
| intI2                   | 0.91     | 0.51     | 0.89     | -0.05    | 0.80   | 1.00   | 0.76   | 0.80   | 0.80     | 0.80      | 0.80     | 0.86      | 0.91     | 0.87   | 0.82   | 0.41       | 0.80                    | 0.96                    | 0.80      | 0.87  | 0.76  | 0.80  | 0.86  | 1.00  | 1.00  | 0.93  | 0.89      | 0.85      | 0.82       | 0.72       | 0.67     | 0.80      |
| intI3                   | 0.87     | 0.37     | 0.89     | 0.22     | 0.67   | 0.93   | 0.58   | 0.67   | 0.67     | 0.67      | 0.67     | 0.77      | 0.87     | 0.79   | 0.79   | 0.20       | 0.67                    | 0.85                    | 0.67      | 0.79  | 0.58  | 0.67  | 0.68  | 0.93  | 0.93  | 1.00  | 0.68      | 0.68      | 0.79       | 0.74       | 0.63     | 0.67      |
| Acinetoba               | 0.77     | 0.47     | 0.71     | -0.25    | 0.76   | 0.89   | 0.80   | 0.76   | 0.76     | 0.76      | 0.76     | 0.85      | 0.77     | 0.81   | 0.79   | 0.61       | 0.76                    | 0.89                    | 0.76      | 0.81  | 0.80  | 0.76  | 0.93  | 0.89  | 0.89  | 0.68  | 1.00      | 0.85      | 0.79       | 0.50       | 0.56     | 0.76      |
| Enterococ               | 0.87     | 0.68     | 0.63     | -0.42    | 0.76   | 0.85   | 0.81   | 0.76   | 0.76     | 0.76      | 0.76     | 0.79      | 0.87     | 0.91   | 0.70   | 0.62       | 0.76                    | 0.93                    | 0.76      | 0.91  | 0.81  | 0.76  | 0.94  | 0.85  | 0.85  | 0.68  | 0.85      | 1.00      | 0.70       | 0.79       | 0.79     | 0.76      |
| Escherichi              | 0.87     | 0.47     | 0.79     | -0.04    | 0.76   | 0.82   | 0.80   | 0.76   | 0.76     | 0.76      | 0.76     | 0.90      | 0.87     | 0.91   | 1.00   | 0.61       | 0.76                    | 0.78                    | 0.76      | 0.91  | 0.80  | 0.76  | 0.82  | 0.82  | 0.82  | 0.79  | 0.79      | 0.70      | 1.00       | 0.68       | 0.74     | 0.76      |
| Klebsiella              | 0.91     | 0.82     | 0.70     | -0.35    | 0.81   | 0.72   | 0.76   | 0.81   | 0.81     | 0.81      | 0.81     | 0.69      | 0.91     | 0.87   | 0.68   | 0.41       | 0.81                    | 0.79                    | 0.81      | 0.87  | 0.76  | 0.81  | 0.67  | 0.72  | 0.72  | 0.74  | 0.50      | 0.79      | 0.68       | 1.00       | 0.92     | 0.81      |
| Pseudomc                | 0.91     | 0.82     | 0.54     | -0.40    | 0.81   | 0.67   | 0.76   | 0.81   | 0.81     | 0.81      | 0.81     | 0.83      | 0.91     | 0.87   | 0.74   | 0.41       | 0.81                    | 0.79                    | 0.81      | 0.87  | 0.76  | 0.81  | 0.77  | 0.67  | 0.67  | 0.63  | 0.56      | 0.79      | 0.74       | 0.92       | 1.00     | 0.81      |
| Staphyloc               | 0.88     | 0.88     | 0.80     | -0.52    | 1.00   | 0.80   | 0.94   | 1.00   | 1.00     | 1.00      | 1.00     | 0.81      | 0.88     | 0.84   | 0.76   | 0.51       | 1.00                    | 0.83                    | 1.00      | 0.84  | 0.94  | 1.00  | 0.76  | 0.80  | 0.80  | 0.67  | 0.76      | 0.76      | 0.76       | 0.81       | 0.81     | 1.00      |

Sampling sites as in Table S2.

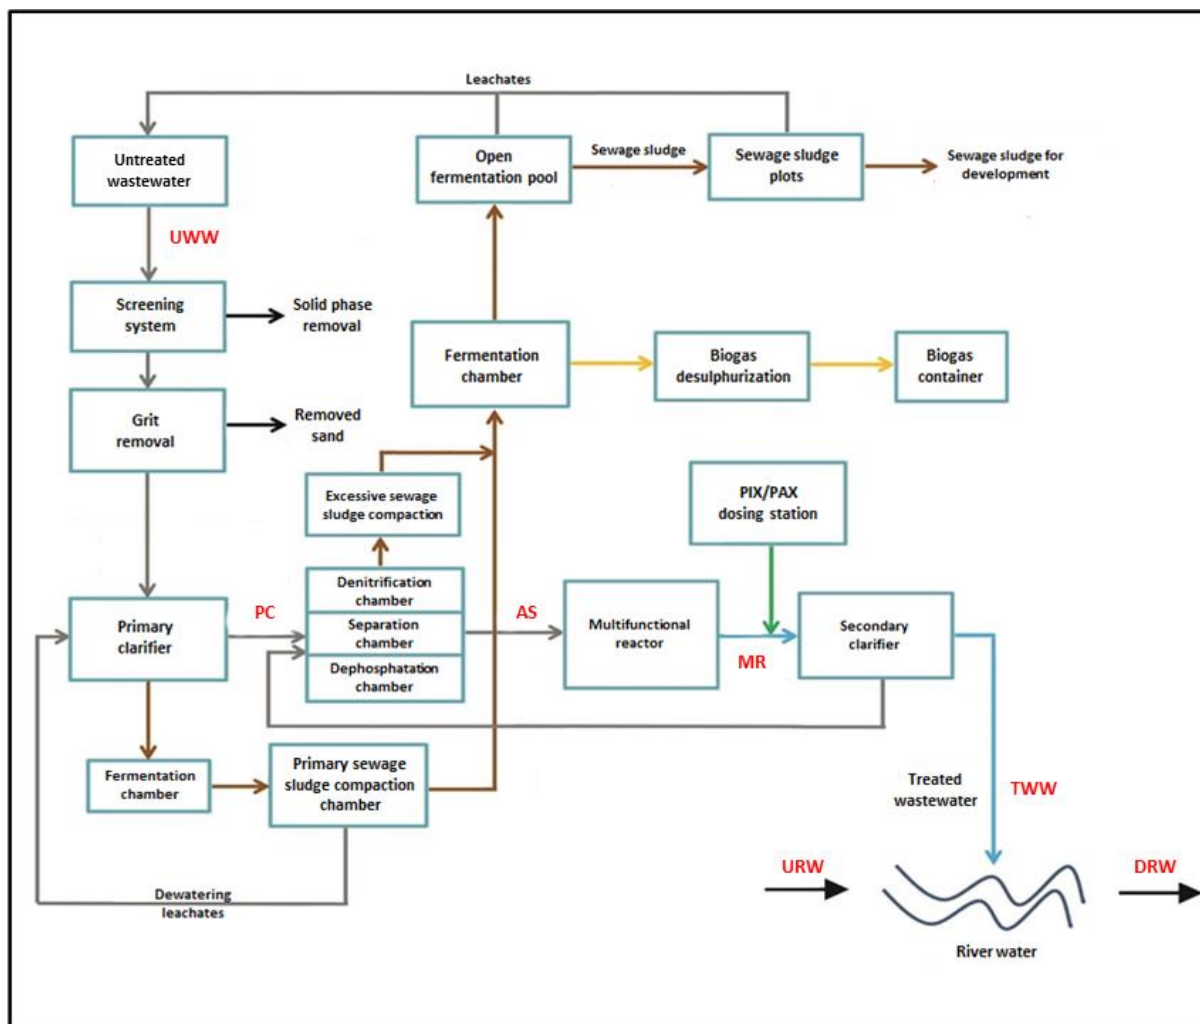

Figure S1. Diagram of the analyzed WWTP.

Sampling sites are marked in red.

Sampling sites as in Table S2.
